# Supplementary material for: Self-assembled magnetic luminescent hybrid micelles containing rare earth Eu for dual-modality MR and optical imaging
Source: Royal Society of Chemistry journal article supplement (doi:10.1039/c3tb21381a), 2013-10-29
Supplement: c3tb21381a.pdf [file c3tb21381a.pdf]

## Supporting Information

### Self-assembled magnetic luminescent hybrid micelles containing rare earth Eu for dual-modality MR and optical imaging

Kai Yan <sup>a, ‡</sup>, Huan Li <sup>b, ‡</sup>, Xin Wang <sup>a</sup>, Changfeng Yi <sup>a</sup>, Quanyuan Zhang <sup>a</sup>, Zushun Xu <sup>a\*\*\*</sup>,  
Haibo Xu <sup>b\*\*</sup> and Andrew K. Whittaker <sup>c\*</sup>

#### 2. Materials and methods

##### 2.1. Materials.

2, 2, 3, 4, 4, 4-hexafluorobutyl methacrylate (HFMA) purchased from Xeogia Fluorine-Silicon Chemical Company (Harbin, China, Chemical Purity) was distilled at reduced pressure before use. Methoxy poly (ethylene glycol) monomethacrylate (PEGMA) (average Mn 950 g/mol) was obtained from Aldrich and used without further purification. Europium oxide (Eu<sub>2</sub>O<sub>3</sub>, 99.99 wt%) was purchased from Shanghai Yuelong Nonferrous Metals and used without further purification. 2, 2'-azobisisobutyronitrile (AIBN) was purified by recrystallization in ethanol. Oleic acid (OA), iron (III) chloride hexahydrate (FeCl<sub>3</sub>·6H<sub>2</sub>O), iron (II) chloride tetrahydrate (FeCl<sub>2</sub>·4H<sub>2</sub>O), ammonium hydroxide solution (NH<sub>3</sub>·H<sub>2</sub>O, 25-28%), ethanol, hexane, hydrochloric acid (HCl), 1,10-phenanthroline (Phen) and methanol were purchased from Sinopharm Chemical Reagent Co. Ltd., China All the reagents were AR and used without further purification. and 3-(4, 5-dimethyl thiazol-2-yl)-2, 5-diphenyl tetrazolium bromide (MTT) were purchased from Sigma-Aldrich.

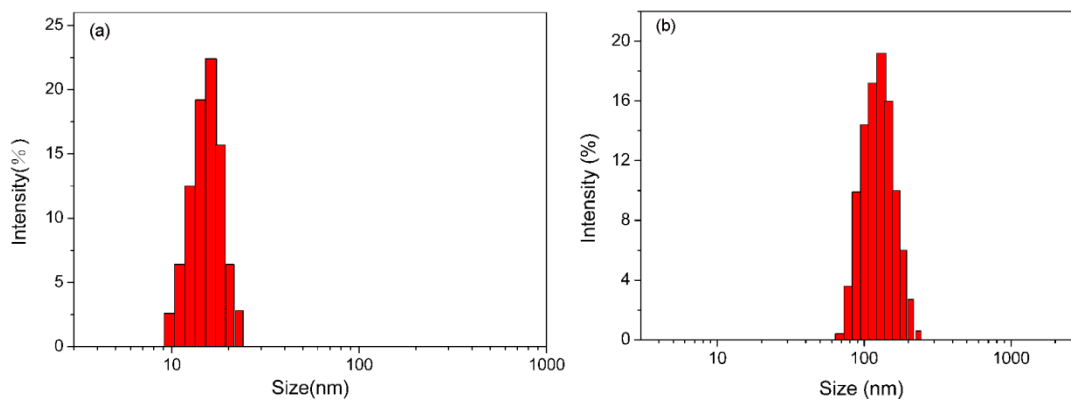

Fig.1

Fig. S1 Size distribution of (a) oleic acid modified  $\text{Fe}_3\text{O}_4$  nanoparticles in hexane and (b) hybrid micelles in water.
